# Supplementary material for: CPAP management of COVID-19 respiratory failure: a first quantitative analysis from an inpatient service evaluation
Source: PubMed Central journal article supplement — BMJ Open Respir Res. 2020 Nov 4;7(1):e000692. doi: 10.1136/bmjresp-2020-000692 (PMC7643430; doi:10.1136/bmjresp-2020-000692), 2020-11-04
Supplement: bmjresp-2020-000692supp001.pdf [file bmjresp-2020-000692supp001.pdf]

## USING CPAP IN COVID-19

*A user guide*

*Wrightington Wigan and Leigh NHS Teaching Foundation Trust*

---

### Introduction

This User Guide has been written to describe how CPAP has been used during the COVID-19 outbreak within our organisation. The use of CPAP required rapid changes within established working practices. This document is a practical guide for using CPAP in other organisations to help to replicate the work we have done and the results we achieved.

|                                                        | Page |
|--------------------------------------------------------|------|
| <a href="#">Section 1 - Equipment</a>                  | 2    |
| <a href="#">Section 2- Implications for Clinicians</a> | 7    |
| <a href="#">Section 3 - Documentation</a>              | 8    |
| <a href="#">Section 4 -Protocol</a>                    | 11   |

## Section 1 -Equipment

### Stellar 150 Using Non-Vented Mask

#### Start up:

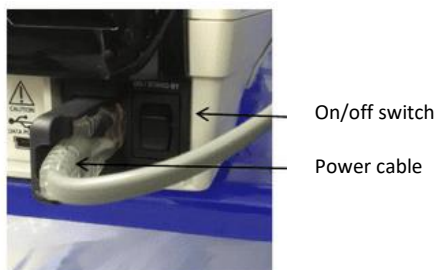

- Attach the power cable to the rear of the device.
- Turn device on using switch sited next to where the power cable enters the machine.

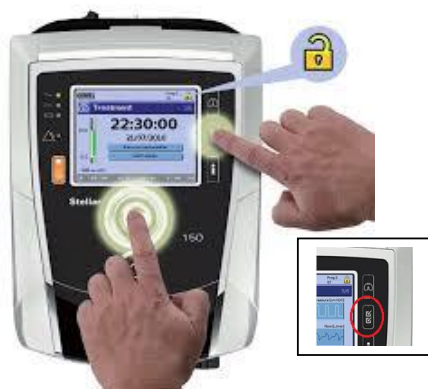

- Once device has powered up, unlock using the 'two ticks' button- (circled) and the central round dial (push and hold down together).
- Once unlocked, select the time you want the machine to be unlocked for, e.g. 5 or 120 minutes. (To re-lock device at any point press and hold same buttons as used to unlock)
- The machine will beep to confirm and the padlock symbol will now be open.

#### Clinical Set-up:

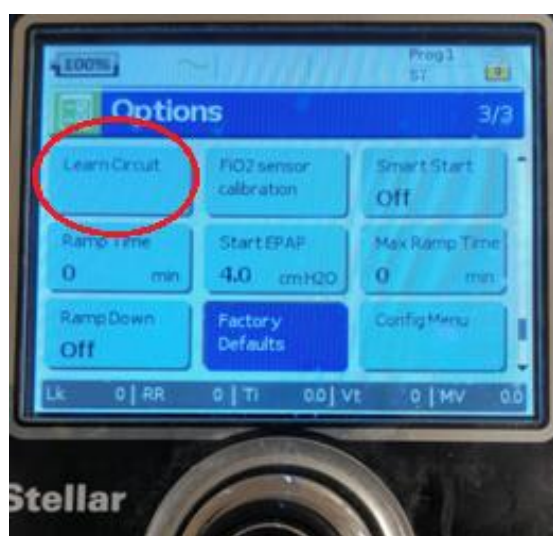

- Press the 'two ticks' button twice to go to page 3/3. Using the central dial scroll round to highlight 'Factory Defaults'. Push down on the dial to select and confirm 'Yes' by pushing down the dial again.
- This should then automatically highlight the 'Learn Circuit' box (circled opposite)- click on this and set up the circuit as shown in diagram below but **do not** attach mask to the patient at this time.

**Circuit Set-up:**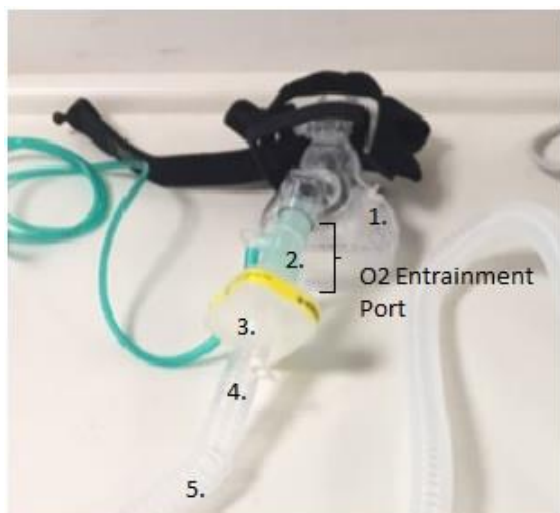

1. Non vented mask
2. O2 Entrainment Port- delivers O2 into circuit from wall point via green tubing
3. Viral/bacterial Filter- **change daily**
4. Exhalation Port
5. Long Tubing that connects to the Stellar device as below

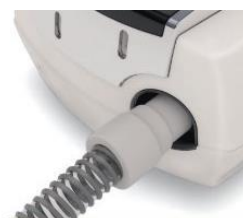

Select 'Start' - you will hear the device run pressure through the circuit twice. This lasts for approximately 1 minute. Once completed, the screen will display a green smiley face and confirm the circuit has been learned successfully.

**Setting the Mode/Pressures:**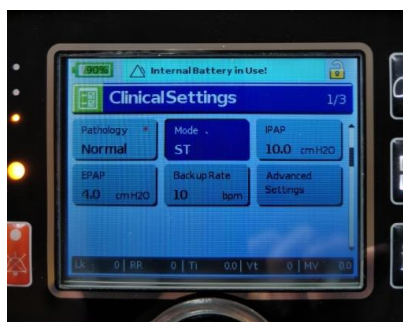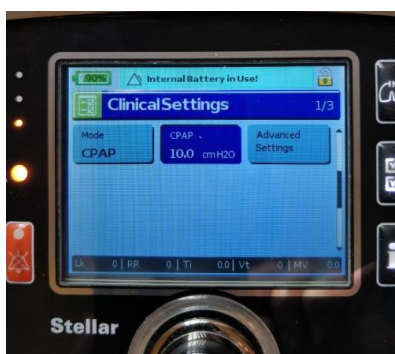

- Press the 'Two ticks' button to display the 'Clinical Settings' screen, 1/3.
- Turn the central dial to highlight 'Pathology' and click down- it will now turn orange.
- Turn the dial until it says 'Normal' then click button again to select – it will now turn dark blue again.
- Next, turn the central dial to highlight 'Mode'. Scroll through the options and click to select 'CPAP'
- Once in CPAP mode- set the fixed CPAP pressure as instructed by prescribing clinician – this will usually be a starting pressure of 10cmH2O.

The mask is now ready to be fitted to the patient so that ventilation can commence. Press the 'Lungs' button (above the 'two ticks' button in the picture above) to return to the home screen.

**DO NOT TURN VENTILATOR ON UNTIL MASK HAS BEEN FITTED TO THE PATIENT**

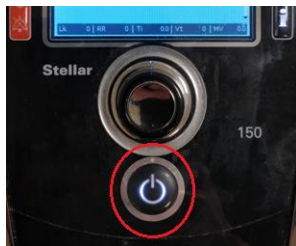

- Once mask fitted to patient press the start button (circled) to begin ventilation.
- The same button is used to stop therapy- confirm when prompted by clicking central dial.

**Remember: NIV mask on → Ventilator on; Ventilator off → NIV mask off**

**Important:**

The back-up battery will allow patients to be transferred from ward to ward without the device needing to be plugged in, however the battery will only last around 2 hours. It is therefore necessary that the machines are **plugged in at all times** when being used on patients or when in storage to keep the battery charged.

## Section 2 – Implications for Clinicians

The problem of potential Aerosol Generation when using CPAP equipment required the need for isolation of the patient and a dedicated team of trained CPAP carers working within dedicated areas.

We deliberately identified areas of wards that could be isolated. The areas which proved to be most suited to our needs of providing isolated space were 8 bedded bay areas with only one entrance to the ward area. The clinical team caring for patients within the CPAP area entered wearing full PPE and remained in that area during their shifts other than to leave for breaks. The ratio of staff:patients was 2:1.

The clinical team who were responsible for caring for patients in the isolated CPAP bays were given an in house training course on how to use and care for patients prior to the adoption of the CPAP equipment. The documentation contained within this booklet provides the resources produced to support our clinical teams. We had an established team, primarily from the Sleep Management Service, who had expertise in using the CPAP devices. It was primarily members from this team who were instrumental in delivering the training required to up skill staff who required training. The CPAP machines were primarily sourced from the Trust Sleep Management Service and were the Stellar CPAP machines which the team had expertise in using.

### Section 3 - Documentation

Whilst the organisation uses Electronic Patient Records, there simply wasn't time to build the documents required for implementation of CPAP and as a result the documents used were paper based Examples are provided below:





#### COVID-19 CPAP Unit Monitoring Chart

|                        |  |
|------------------------|--|
| Update to NoK / Family |  |
|------------------------|--|

General Notes/Communication

|                |  |                                   |             |     |     |
|----------------|--|-----------------------------------|-------------|-----|-----|
| First Name     |  | Surname                           |             |     |     |
| DOB            |  | Age                               |             |     |     |
| Hospital No.   |  | Consultant                        |             |     |     |
| Admission Date |  | Admission Day No.                 |             |     |     |
| CPAP Started   |  | CPAP Day No.                      |             |     |     |
| Today's Date:  |  | HMEF Change <input type="radio"/> | Target Sats | 92% | 88% |

|                 |                   |  |  |  |  |
|-----------------|-------------------|--|--|--|--|
| Shift Nurse/HCA | Please print name |  |  |  |  |
| Early           |                   |  |  |  |  |
| Late            |                   |  |  |  |  |
| Night           |                   |  |  |  |  |

|                 |                 |   |      |   |   |      |   |   |   |
|-----------------|-----------------|---|------|---|---|------|---|---|---|
| Frailty Score   | 1               | 2 | 3    | 4 | 5 | 6    | 7 | 8 | 9 |
| Ceiling of Care | Full Escalation |   | CPAP |   |   | DNAR |   |   |   |

Daily Weaning Plan

|                                                                            |        |
|----------------------------------------------------------------------------|--------|
| <input type="checkbox"/> Continuous CPAP (Breaks only for eating/drinking) | Other: |
| <input type="checkbox"/> 4 hours on 1 hour off                             |        |
| <input type="checkbox"/> 3 hours on 2 hours off                            |        |
| <input type="checkbox"/> 2 hours on, 3 hours off                           |        |

Daily Mobility Plan

Daily Positioning Plan

Daily Ward Round Plan

| System                | Parameter                                                                                                                                    | Time                        | 11  | 12 | 13 | 14 | 15 | 16 | 17 | 18 | 19 | 20 | 21 | 22 | 23 | 00 | 01 | 02 | 03 | 04 | 05 | 06 | 07 | 08 | 09 | 10 |  |  |  |
|-----------------------|----------------------------------------------------------------------------------------------------------------------------------------------|-----------------------------|-----|----|----|----|----|----|----|----|----|----|----|----|----|----|----|----|----|----|----|----|----|----|----|----|--|--|--|
| CARDIOVASCULAR        | BP cuff (BLACK) v<br>I<br>I<br>I<br>^<br>^<br>MAP (RED) x<br>HEART RATE (BLUE) x<br>Please chart MAP & HR as 'x' and join up to form a graph | 210                         |     |    |    |    |    |    |    |    |    |    |    |    |    |    |    |    |    |    |    |    |    |    |    |    |  |  |  |
|                       |                                                                                                                                              | 200                         |     |    |    |    |    |    |    |    |    |    |    |    |    |    |    |    |    |    |    |    |    |    |    |    |  |  |  |
|                       |                                                                                                                                              | 190                         |     |    |    |    |    |    |    |    |    |    |    |    |    |    |    |    |    |    |    |    |    |    |    |    |  |  |  |
|                       |                                                                                                                                              | 180                         |     |    |    |    |    |    |    |    |    |    |    |    |    |    |    |    |    |    |    |    |    |    |    |    |  |  |  |
|                       |                                                                                                                                              | 170                         |     |    |    |    |    |    |    |    |    |    |    |    |    |    |    |    |    |    |    |    |    |    |    |    |  |  |  |
|                       |                                                                                                                                              | 160                         |     |    |    |    |    |    |    |    |    |    |    |    |    |    |    |    |    |    |    |    |    |    |    |    |  |  |  |
|                       |                                                                                                                                              | 150                         |     |    |    |    |    |    |    |    |    |    |    |    |    |    |    |    |    |    |    |    |    |    |    |    |  |  |  |
|                       |                                                                                                                                              | 140                         |     |    |    |    |    |    |    |    |    |    |    |    |    |    |    |    |    |    |    |    |    |    |    |    |  |  |  |
|                       |                                                                                                                                              | 130                         |     |    |    |    |    |    |    |    |    |    |    |    |    |    |    |    |    |    |    |    |    |    |    |    |  |  |  |
|                       |                                                                                                                                              | 120                         |     |    |    |    |    |    |    |    |    |    |    |    |    |    |    |    |    |    |    |    |    |    |    |    |  |  |  |
|                       |                                                                                                                                              | 110                         |     |    |    |    |    |    |    |    |    |    |    |    |    |    |    |    |    |    |    |    |    |    |    |    |  |  |  |
|                       |                                                                                                                                              | 100                         |     |    |    |    |    |    |    |    |    |    |    |    |    |    |    |    |    |    |    |    |    |    |    |    |  |  |  |
|                       |                                                                                                                                              | 90                          |     |    |    |    |    |    |    |    |    |    |    |    |    |    |    |    |    |    |    |    |    |    |    |    |  |  |  |
|                       |                                                                                                                                              | 80                          |     |    |    |    |    |    |    |    |    |    |    |    |    |    |    |    |    |    |    |    |    |    |    |    |  |  |  |
|                       |                                                                                                                                              | 70                          |     |    |    |    |    |    |    |    |    |    |    |    |    |    |    |    |    |    |    |    |    |    |    |    |  |  |  |
| 60                    |                                                                                                                                              |                             |     |    |    |    |    |    |    |    |    |    |    |    |    |    |    |    |    |    |    |    |    |    |    |    |  |  |  |
| 50                    |                                                                                                                                              |                             |     |    |    |    |    |    |    |    |    |    |    |    |    |    |    |    |    |    |    |    |    |    |    |    |  |  |  |
| 40                    |                                                                                                                                              |                             |     |    |    |    |    |    |    |    |    |    |    |    |    |    |    |    |    |    |    |    |    |    |    |    |  |  |  |
| 30                    |                                                                                                                                              |                             |     |    |    |    |    |    |    |    |    |    |    |    |    |    |    |    |    |    |    |    |    |    |    |    |  |  |  |
| 20                    |                                                                                                                                              |                             |     |    |    |    |    |    |    |    |    |    |    |    |    |    |    |    |    |    |    |    |    |    |    |    |  |  |  |
| 10                    |                                                                                                                                              |                             |     |    |    |    |    |    |    |    |    |    |    |    |    |    |    |    |    |    |    |    |    |    |    |    |  |  |  |
| 5                     |                                                                                                                                              |                             |     |    |    |    |    |    |    |    |    |    |    |    |    |    |    |    |    |    |    |    |    |    |    |    |  |  |  |
| RESPIRATORY           | Please chart Sats & RR as 'x' and join up to form a graph<br>Oxygen Sats (%)<br>OBSERVED Resp Rate (bpm)                                     | 50                          | 100 |    |    |    |    |    |    |    |    |    |    |    |    |    |    |    |    |    |    |    |    |    |    |    |  |  |  |
|                       |                                                                                                                                              | 40                          | 95  |    |    |    |    |    |    |    |    |    |    |    |    |    |    |    |    |    |    |    |    |    |    |    |  |  |  |
|                       |                                                                                                                                              | 30                          | 90  |    |    |    |    |    |    |    |    |    |    |    |    |    |    |    |    |    |    |    |    |    |    |    |  |  |  |
|                       |                                                                                                                                              | 20                          | 85  |    |    |    |    |    |    |    |    |    |    |    |    |    |    |    |    |    |    |    |    |    |    |    |  |  |  |
|                       |                                                                                                                                              | 10                          | 80  |    |    |    |    |    |    |    |    |    |    |    |    |    |    |    |    |    |    |    |    |    |    |    |  |  |  |
|                       |                                                                                                                                              | 0                           | 75  |    |    |    |    |    |    |    |    |    |    |    |    |    |    |    |    |    |    |    |    |    |    |    |  |  |  |
|                       | Resp Obs<br>Resp Support                                                                                                                     | CPAP/NRB/Venturi            |     |    |    |    |    |    |    |    |    |    |    |    |    |    |    |    |    |    |    |    |    |    |    |    |  |  |  |
|                       |                                                                                                                                              | Position (Prone/L/R/Set Up) |     |    |    |    |    |    |    |    |    |    |    |    |    |    |    |    |    |    |    |    |    |    |    |    |  |  |  |
|                       |                                                                                                                                              | O2 Flow Rate (lpm)          |     |    |    |    |    |    |    |    |    |    |    |    |    |    |    |    |    |    |    |    |    |    |    |    |  |  |  |
|                       |                                                                                                                                              | PEEP                        |     |    |    |    |    |    |    |    |    |    |    |    |    |    |    |    |    |    |    |    |    |    |    |    |  |  |  |
|                       |                                                                                                                                              | Minute Volume (L)           |     |    |    |    |    |    |    |    |    |    |    |    |    |    |    |    |    |    |    |    |    |    |    |    |  |  |  |
|                       |                                                                                                                                              | Tidal Volume (mls)          |     |    |    |    |    |    |    |    |    |    |    |    |    |    |    |    |    |    |    |    |    |    |    |    |  |  |  |
|                       | Blood Gases                                                                                                                                  | Sputum/Cough                |     |    |    |    |    |    |    |    |    |    |    |    |    |    |    |    |    |    |    |    |    |    |    |    |  |  |  |
|                       |                                                                                                                                              | CBG/ABG                     |     |    |    |    |    |    |    |    |    |    |    |    |    |    |    |    |    |    |    |    |    |    |    |    |  |  |  |
|                       |                                                                                                                                              | pH (Temp Corrected)         |     |    |    |    |    |    |    |    |    |    |    |    |    |    |    |    |    |    |    |    |    |    |    |    |  |  |  |
| PO2 (Temp Corrected)  |                                                                                                                                              |                             |     |    |    |    |    |    |    |    |    |    |    |    |    |    |    |    |    |    |    |    |    |    |    |    |  |  |  |
| PCO2 (Temp Corrected) |                                                                                                                                              |                             |     |    |    |    |    |    |    |    |    |    |    |    |    |    |    |    |    |    |    |    |    |    |    |    |  |  |  |
| HCO3                  |                                                                                                                                              |                             |     |    |    |    |    |    |    |    |    |    |    |    |    |    |    |    |    |    |    |    |    |    |    |    |  |  |  |
| BE                    |                                                                                                                                              |                             |     |    |    |    |    |    |    |    |    |    |    |    |    |    |    |    |    |    |    |    |    |    |    |    |  |  |  |
| Sats                  |                                                                                                                                              |                             |     |    |    |    |    |    |    |    |    |    |    |    |    |    |    |    |    |    |    |    |    |    |    |    |  |  |  |
| P Ox (as gas taken)   |                                                                                                                                              |                             |     |    |    |    |    |    |    |    |    |    |    |    |    |    |    |    |    |    |    |    |    |    |    |    |  |  |  |
| Lactate               |                                                                                                                                              |                             |     |    |    |    |    |    |    |    |    |    |    |    |    |    |    |    |    |    |    |    |    |    |    |    |  |  |  |
| NURSING               | Mouth Care                                                                                                                                   |                             |     |    |    |    |    |    |    |    |    |    |    |    |    |    |    |    |    |    |    |    |    |    |    |    |  |  |  |
|                       | Check Facial Pressure Areas                                                                                                                  |                             |     |    |    |    |    |    |    |    |    |    |    |    |    |    |    |    |    |    |    |    |    |    |    |    |  |  |  |
|                       | Eaten                                                                                                                                        |                             |     |    |    |    |    |    |    |    |    |    |    |    |    |    |    |    |    |    |    |    |    |    |    |    |  |  |  |
|                       | Drink                                                                                                                                        |                             |     |    |    |    |    |    |    |    |    |    |    |    |    |    |    |    |    |    |    |    |    |    |    |    |  |  |  |

**Monitoring of patients on CPAP therapy****Patient Name:****D.O.B:****Hospital Number:**Once CPAP treatment started aim for the following SpO<sub>2</sub> target:

- SpO<sub>2</sub> 92% for all patients **UNLESS** they are COPD/structural lung disease in which case aim for SpO<sub>2</sub> 88%

Titrate pressure (cmH<sub>2</sub>O) first up to a maximum of 10cmH<sub>2</sub>OIf this does not achieve required SpO<sub>2</sub> levels then increase oxygen until desired range is reached.

| DATE | TIME | PRESSURE (cmH <sub>2</sub> O) | O <sub>2</sub> (Litres/min) | SPO <sub>2</sub> | POSITION |
|------|------|-------------------------------|-----------------------------|------------------|----------|
|      |      |                               |                             |                  |          |
|      |      |                               |                             |                  |          |
|      |      |                               |                             |                  |          |
|      |      |                               |                             |                  |          |
|      |      |                               |                             |                  |          |
|      |      |                               |                             |                  |          |
|      |      |                               |                             |                  |          |
|      |      |                               |                             |                  |          |
|      |      |                               |                             |                  |          |



**COVID-19 CPAP Trial Form**

|                 |  |
|-----------------|--|
| Patient Name    |  |
| DOB             |  |
| Hospital Number |  |
| Frailty Score   |  |
| Ceiling of Care |  |

| Baseline Parameters |  |
|---------------------|--|
| Resp Rate           |  |
| Sats                |  |
| Oxygen              |  |
| Position            |  |

Apply 5-10 PEEP with 5lpm oxygen to begin with. Once CPAP treatment started aim for the following SpO2 target:

- Spo2 92% for all patients UNLESS they are COPD/structural lung disease in which case aim for SpO2 88%

Titrate pressure initially up to a maximum of 10cmH20 (Can go higher if a larger patient)

If this does not achieve required SpO2 levels then increase oxygen until desired range is reached.

Trial Start Time:

| Trial Obs    | DATE | TIME | PEEP (cmH20) | O2 (lpm) | SPO2 % | Resp Rate | TV (mls) | MV (L) | POSITION |
|--------------|------|------|--------------|----------|--------|-----------|----------|--------|----------|
| 1<br>30 mins |      |      |              |          |        |           |          |        |          |
| 2<br>1hr     |      |      |              |          |        |           |          |        |          |
| 3<br>1hr 30  |      |      |              |          |        |           |          |        |          |
| 4<br>2 hrs   |      |      |              |          |        |           |          |        |          |

| Parameter | Baseline (if any) | 1 Hr on CPAP | 2 Hr on CPAP |
|-----------|-------------------|--------------|--------------|
| Date      |                   |              |              |
| Time      |                   |              |              |
| Oxygen    |                   |              |              |
| pH        |                   |              |              |
| pCO2      |                   |              |              |
| pO2       |                   |              |              |
| HCO3      |                   |              |              |
| BE        |                   |              |              |
| sO2       |                   |              |              |
| Lac       |                   |              |              |

|          |
|----------|
| Comments |
|----------|

| CPAP Trial Outcome     |              |                                       |           |
|------------------------|--------------|---------------------------------------|-----------|
| Progress to Intubation | Extend Trial | Continue CPAP as guided by Consultant | End Trial |
|                        |              |                                       |           |

Trial to be discussed with Respiratory +/- Intensive Care Consultant for decision on further management

Name..... Date..... Time.....

### Section 4 - Protocol

Protocols for the management of patients requiring CPAP therapy were developed continually during the COVID-19 outbreak. Protocols evolved during the outbreak as a result of growing clinical expertise and confidence.

The example below illustrates a later version of the treatment pathway developed.

|                              |                                                                                                                |                                                                                                                                         |                                                                                          |
|------------------------------|----------------------------------------------------------------------------------------------------------------|-----------------------------------------------------------------------------------------------------------------------------------------|------------------------------------------------------------------------------------------|
| Timeline                     | Patient COVID Positive (confirmed or suspected) and Type 1 Respiratory failure                                 |                                                                                                                                         |                                                                                          |
|                              | Commence Nasal Prong Oxygen IV fluids and send bloods<br>Hourly observations                                   |                                                                                                                                         |                                                                                          |
|                              | Commence CPAP if requiring over 4l/min to maintain sats over 94%<br>CPAP at 5cm H2O pressure                   |                                                                                                                                         |                                                                                          |
| Within 48 hours of admission | Responding<br>Reducing RR or<br>Reducing FiO2                                                                  | No change                                                                                                                               | Worsening<br>Increasing RR or<br>increasing FiO2                                         |
| Review at every 8 hours      | Continue CPAP                                                                                                  | Increase FiO2 to maintain Sats over 94%<br>Increase CPAP pressure to 10cm and then 15cm pressure with sequential reviews                | Arrange ICU review. Consider whether appropriate for ICU care / escalate if appropriate. |
|                              | Wean oxygen and pressure according to chart 1 aiming to leave the patient on 40% oxygen via facemask or better | Where there is no improvement at 15cm pressure-arrange ICU review. Consider whether appropriate for ICU care / escalate if appropriate. |                                                                                          |
