# Supplementary material for: CPAP management of COVID-19 respiratory failure: a first quantitative analysis from an inpatient service evaluation
Source: PubMed Central journal article supplement — BMJ Open Respir Res. 2020 Nov 4;7(1):e000692. doi: 10.1136/bmjresp-2020-000692 (PMC7643430; doi:10.1136/bmjresp-2020-000692), 2020-11-04
Supplement: bmjresp-2020-000692supp002.pdf [file bmjresp-2020-000692supp002.pdf]

Supplementary Information. Full Table 3.

| CPAP | Age | Sex    | Hypertension | From Care Home | Intubated | Time    | Group | Survival Probabilities |
|------|-----|--------|--------------|----------------|-----------|---------|-------|------------------------|
| Yes  | 60  | Female | No           | No             | No        | <=7days | Early | 0.910395432            |
| Yes  | 60  | Female | No           | No             | No        | <=7days | Late  | 0.910395432            |
| Yes  | 60  | Female | Yes          | No             | Yes       | <=7days | Early | 0.899582935            |
| Yes  | 60  | Female | Yes          | No             | Yes       | <=7days | Late  | 0.899582935            |
| No   | 60  | Female | No           | No             | No        | >7days  | Early | 0.887800382            |
| No   | 60  | Female | No           | No             | No        | >7days  | Late  | 0.887800382            |
| No   | 60  | Female | Yes          | No             | Yes       | >7days  | Early | 0.874454723            |
| No   | 60  | Female | Yes          | No             | Yes       | >7days  | Late  | 0.874454723            |
| Yes  | 60  | Female | Yes          | No             | No        | <=7days | Early | 0.851197476            |
| Yes  | 60  | Female | Yes          | No             | No        | <=7days | Late  | 0.851197476            |
| Yes  | 80  | Female | No           | No             | No        | <=7days | Early | 0.833556904            |
| Yes  | 80  | Female | No           | No             | No        | <=7days | Late  | 0.833556904            |
| Yes  | 60  | Female | No           | Yes            | No        | <=7days | Early | 0.832125577            |
| Yes  | 60  | Female | No           | Yes            | No        | <=7days | Late  | 0.832125577            |
| No   | 60  | Female | Yes          | No             | No        | >7days  | Early | 0.815264181            |
| No   | 60  | Female | Yes          | No             | No        | >7days  | Late  | 0.815264181            |
| Yes  | 60  | Female | No           | No             | No        | >7days  | Early | 0.814519675            |
| Yes  | 60  | Female | No           | No             | No        | >7days  | Late  | 0.814519675            |
| Yes  | 80  | Female | Yes          | No             | Yes       | <=7days | Early | 0.814465218            |
| Yes  | 80  | Female | Yes          | No             | Yes       | <=7days | Late  | 0.814465218            |
| Yes  | 60  | Female | Yes          | Yes            | Yes       | <=7days | Early | 0.812888851            |
| Yes  | 60  | Female | Yes          | Yes            | Yes       | <=7days | Late  | 0.812888851            |
| No   | 80  | Female | No           | No             | No        | >7days  | Early | 0.79390474             |
| No   | 80  | Female | No           | No             | No        | >7days  | Late  | 0.79390474             |
| Yes  | 60  | Female | Yes          | No             | Yes       | >7days  | Early | 0.793527288            |
| Yes  | 60  | Female | Yes          | No             | Yes       | >7days  | Late  | 0.793527288            |
| No   | 60  | Female | No           | Yes            | No        | >7days  | Early | 0.792176938            |
| No   | 60  | Female | No           | Yes            | No        | >7days  | Late  | 0.792176938            |
| No   | 60  | Female | No           | No             | No        | <=7days | Early | 0.782401314            |
| No   | 60  | Female | No           | No             | No        | <=7days | Late  | 0.782401314            |
| No   | 80  | Female | Yes          | No             | Yes       | >7days  | Early | 0.770924311            |
| No   | 80  | Female | Yes          | No             | Yes       | >7days  | Late  | 0.770924311            |
| No   | 60  | Female | Yes          | Yes            | Yes       | >7days  | Early | 0.769033248            |
| No   | 60  | Female | Yes          | Yes            | Yes       | >7days  | Late  | 0.769033248            |
| Yes  | 60  | Female | No           | No             | Yes       | <=7days | Early | 0.764151136            |
| Yes  | 60  | Female | No           | No             | Yes       | <=7days | Late  | 0.764151136            |
| No   | 60  | Female | Yes          | No             | Yes       | <=7days | Early | 0.758343841            |
| No   | 60  | Female | Yes          | No             | Yes       | <=7days | Late  | 0.758343841            |
| Yes  | 80  | Female | Yes          | No             | No        | <=7days | Early | 0.73165857             |
| Yes  | 80  | Female | Yes          | No             | No        | <=7days | Late  | 0.73165857             |
| Yes  | 60  | Female | Yes          | Yes            | No        | <=7days | Early | 0.72950373             |
| Yes  | 60  | Female | Yes          | Yes            | No        | <=7days | Late  | 0.72950373             |
| No   | 60  | Female | No           | No             | Yes       | >7days  | Early | 0.711057205            |

|     |    |        |     |     |     |         |       |             |
|-----|----|--------|-----|-----|-----|---------|-------|-------------|
| No  | 60 | Female | No  | No  | Yes | >7days  | Late  | 0.711057205 |
| Yes | 60 | Female | Yes | No  | No  | >7days  | Early | 0.703215759 |
| Yes | 60 | Female | Yes | No  | No  | >7days  | Late  | 0.703215759 |
| Yes | 80 | Female | No  | Yes | No  | <=7days | Early | 0.700201471 |
| Yes | 80 | Female | No  | Yes | No  | <=7days | Late  | 0.700201471 |
| Yes | 60 | Male   | No  | No  | No  | <=7days | Early | 0.685018693 |
| Yes | 60 | Male   | No  | No  | No  | <=7days | Late  | 0.685018693 |
| No  | 80 | Female | Yes | No  | No  | >7days  | Early | 0.672948356 |
| No  | 80 | Female | Yes | No  | No  | >7days  | Late  | 0.672948356 |
| Yes | 80 | Female | No  | No  | No  | >7days  | Early | 0.671757093 |
| Yes | 80 | Female | No  | No  | No  | >7days  | Late  | 0.671757093 |
| No  | 60 | Female | Yes | Yes | No  | >7days  | Early | 0.670436825 |
| No  | 60 | Female | Yes | Yes | No  | >7days  | Late  | 0.670436825 |
| Yes | 60 | Female | No  | Yes | No  | >7days  | Early | 0.669238814 |
| Yes | 60 | Female | No  | Yes | No  | >7days  | Late  | 0.669238814 |
| Yes | 80 | Female | Yes | Yes | Yes | <=7days | Early | 0.669151226 |
| Yes | 80 | Female | Yes | Yes | Yes | <=7days | Late  | 0.669151226 |
| No  | 60 | Female | Yes | No  | No  | <=7days | Early | 0.656300897 |
| No  | 60 | Female | Yes | No  | No  | <=7days | Late  | 0.656300897 |
| Yes | 60 | Male   | Yes | No  | Yes | <=7days | Early | 0.652817787 |
| Yes | 60 | Male   | Yes | No  | Yes | <=7days | Late  | 0.652817787 |
| Yes | 80 | Female | Yes | No  | Yes | >7days  | Early | 0.638588744 |
| Yes | 80 | Female | Yes | No  | Yes | >7days  | Late  | 0.638588744 |
| No  | 80 | Female | No  | Yes | No  | >7days  | Early | 0.63648302  |
| No  | 80 | Female | No  | Yes | No  | >7days  | Late  | 0.63648302  |
| Yes | 60 | Female | Yes | Yes | Yes | >7days  | Early | 0.63589077  |
| Yes | 60 | Female | Yes | Yes | Yes | >7days  | Late  | 0.63589077  |
| No  | 80 | Female | No  | No  | No  | <=7days | Early | 0.62133949  |
| No  | 80 | Female | No  | No  | No  | <=7days | Late  | 0.62133949  |
| No  | 60 | Female | No  | Yes | No  | <=7days | Early | 0.618554476 |
| No  | 60 | Female | No  | Yes | No  | <=7days | Late  | 0.618554476 |
| No  | 80 | Female | Yes | Yes | Yes | >7days  | Early | 0.600916908 |
| No  | 80 | Female | Yes | Yes | Yes | >7days  | Late  | 0.600916908 |
| Yes | 80 | Female | No  | No  | Yes | <=7days | Early | 0.593540871 |
| Yes | 80 | Female | No  | No  | Yes | <=7days | Late  | 0.593540871 |
| Yes | 60 | Female | No  | Yes | Yes | <=7days | Early | 0.5906252   |
| Yes | 60 | Female | No  | Yes | Yes | <=7days | Late  | 0.5906252   |
| No  | 80 | Female | Yes | No  | Yes | <=7days | Early | 0.584824512 |
| No  | 80 | Female | Yes | No  | Yes | <=7days | Late  | 0.584824512 |
| No  | 60 | Female | Yes | Yes | Yes | <=7days | Early | 0.581870389 |
| No  | 60 | Female | Yes | Yes | Yes | <=7days | Late  | 0.581870389 |
| Yes | 60 | Female | No  | No  | Yes | >7days  | Early | 0.555521013 |
| Yes | 60 | Female | No  | No  | Yes | >7days  | Late  | 0.555521013 |
| Yes | 80 | Female | Yes | Yes | No  | <=7days | Early | 0.542463518 |
| Yes | 80 | Female | Yes | Yes | No  | <=7days | Late  | 0.542463518 |
| Yes | 60 | Male   | Yes | No  | No  | <=7days | Early | 0.522433738 |
| Yes | 60 | Male   | Yes | No  | No  | <=7days | Late  | 0.522433738 |

|     |    |        |     |     |     |         |       |             |
|-----|----|--------|-----|-----|-----|---------|-------|-------------|
| No  | 80 | Female | No  | No  | Yes | >7days  | Early | 0.51617843  |
| No  | 80 | Female | No  | No  | Yes | >7days  | Late  | 0.51617843  |
| No  | 60 | Female | No  | Yes | Yes | >7days  | Early | 0.512966075 |
| No  | 60 | Female | No  | Yes | Yes | >7days  | Late  | 0.512966075 |
| Yes | 80 | Female | Yes | No  | No  | >7days  | Early | 0.505196499 |
| Yes | 80 | Female | Yes | No  | No  | >7days  | Late  | 0.505196499 |
| Yes | 60 | Female | Yes | Yes | No  | >7days  | Early | 0.501950577 |
| Yes | 60 | Female | Yes | Yes | No  | >7days  | Late  | 0.501950577 |
| No  | 60 | Female | No  | No  | Yes | <=7days | Early | 0.495036028 |
| No  | 60 | Female | No  | No  | Yes | <=7days | Late  | 0.495036028 |
| Yes | 80 | Male   | No  | No  | No  | <=7days | Early | 0.480152544 |
| Yes | 80 | Male   | No  | No  | No  | <=7days | Late  | 0.480152544 |
| Yes | 60 | Male   | No  | Yes | No  | <=7days | Early | 0.476838607 |
| Yes | 60 | Male   | No  | Yes | No  | <=7days | Late  | 0.476838607 |
| No  | 60 | Male   | No  | No  | No  | >7days  | Early | 0.474332217 |
| No  | 60 | Male   | No  | No  | No  | >7days  | Late  | 0.474332217 |
| No  | 80 | Female | Yes | Yes | No  | >7days  | Early | 0.460529455 |
| No  | 80 | Female | Yes | Yes | No  | >7days  | Late  | 0.460529455 |
| Yes | 80 | Female | No  | Yes | No  | >7days  | Early | 0.458934902 |
| Yes | 80 | Female | No  | Yes | No  | >7days  | Late  | 0.458934902 |
| No  | 80 | Female | Yes | No  | No  | <=7days | Early | 0.441885288 |
| No  | 80 | Female | Yes | No  | No  | <=7days | Late  | 0.441885288 |
| No  | 60 | Female | Yes | Yes | No  | <=7days | Early | 0.438491537 |
| No  | 60 | Female | Yes | Yes | No  | <=7days | Late  | 0.438491537 |
| Yes | 80 | Male   | Yes | No  | Yes | <=7days | Early | 0.437348665 |
| Yes | 80 | Male   | Yes | No  | Yes | <=7days | Late  | 0.437348665 |
| Yes | 60 | Male   | Yes | Yes | Yes | <=7days | Early | 0.43394748  |
| Yes | 60 | Male   | Yes | Yes | Yes | <=7days | Late  | 0.43394748  |
| No  | 60 | Male   | Yes | No  | Yes | >7days  | Early | 0.431377099 |
| No  | 60 | Male   | Yes | No  | Yes | >7days  | Late  | 0.431377099 |
| Yes | 80 | Female | Yes | Yes | Yes | >7days  | Early | 0.415624892 |
| Yes | 80 | Female | Yes | Yes | Yes | >7days  | Late  | 0.415624892 |
| No  | 80 | Female | No  | Yes | No  | <=7days | Early | 0.393931948 |
| No  | 80 | Female | No  | Yes | No  | <=7days | Late  | 0.393931948 |
| No  | 60 | Male   | No  | No  | No  | <=7days | Early | 0.37199309  |
| No  | 60 | Male   | No  | No  | No  | <=7days | Late  | 0.37199309  |
| Yes | 80 | Female | No  | Yes | Yes | <=7days | Early | 0.360169914 |
| Yes | 80 | Female | No  | Yes | Yes | <=7days | Late  | 0.360169914 |
| No  | 80 | Female | Yes | Yes | Yes | <=7days | Early | 0.349888561 |
| No  | 80 | Female | Yes | Yes | Yes | <=7days | Late  | 0.349888561 |
| Yes | 60 | Male   | No  | No  | Yes | <=7days | Early | 0.338241934 |
| Yes | 60 | Male   | No  | No  | Yes | <=7days | Late  | 0.338241934 |
| No  | 60 | Male   | Yes | No  | Yes | <=7days | Early | 0.328001693 |
| No  | 60 | Male   | Yes | No  | Yes | <=7days | Late  | 0.328001693 |
| Yes | 80 | Female | No  | No  | Yes | >7days  | Early | 0.319815887 |
| Yes | 80 | Female | No  | No  | Yes | >7days  | Late  | 0.319815887 |
| Yes | 60 | Female | No  | Yes | Yes | >7days  | Early | 0.316392531 |

|     |    |        |     |     |     |         |       |             |
|-----|----|--------|-----|-----|-----|---------|-------|-------------|
| Yes | 60 | Female | No  | Yes | Yes | >7days  | Late  | 0.316392531 |
| Yes | 80 | Male   | Yes | No  | No  | <=7days | Early | 0.283909912 |
| Yes | 80 | Male   | Yes | No  | No  | <=7days | Late  | 0.283909912 |
| Yes | 60 | Male   | Yes | Yes | No  | <=7days | Early | 0.280555317 |
| Yes | 60 | Male   | Yes | Yes | No  | <=7days | Late  | 0.280555317 |
| No  | 60 | Male   | Yes | No  | No  | >7days  | Early | 0.278029238 |
| No  | 60 | Male   | Yes | No  | No  | >7days  | Late  | 0.278029238 |
| Yes | 60 | Male   | No  | No  | No  | >7days  | Early | 0.276441832 |
| Yes | 60 | Male   | No  | No  | No  | >7days  | Late  | 0.276441832 |
| No  | 80 | Female | No  | Yes | Yes | >7days  | Early | 0.274017058 |
| No  | 80 | Female | No  | Yes | Yes | >7days  | Late  | 0.274017058 |
| Yes | 80 | Female | Yes | Yes | No  | >7days  | Early | 0.262720871 |
| Yes | 80 | Female | Yes | Yes | No  | >7days  | Late  | 0.262720871 |
| No  | 80 | Female | No  | No  | Yes | <=7days | Early | 0.255747853 |
| No  | 80 | Female | No  | No  | Yes | <=7days | Late  | 0.255747853 |
| No  | 60 | Female | No  | Yes | Yes | <=7days | Early | 0.252476907 |
| No  | 60 | Female | No  | Yes | Yes | <=7days | Late  | 0.252476907 |
| Yes | 80 | Male   | No  | Yes | No  | <=7days | Early | 0.237831111 |
| Yes | 80 | Male   | No  | Yes | No  | <=7days | Late  | 0.237831111 |
| No  | 80 | Male   | No  | No  | No  | >7days  | Early | 0.235412782 |
| No  | 80 | Male   | No  | No  | No  | >7days  | Late  | 0.235412782 |
| Yes | 60 | Male   | Yes | No  | Yes | >7days  | Early | 0.234712211 |
| Yes | 60 | Male   | Yes | No  | Yes | >7days  | Late  | 0.234712211 |
| No  | 60 | Male   | No  | Yes | No  | >7days  | Early | 0.232220219 |
| No  | 60 | Male   | No  | Yes | No  | >7days  | Late  | 0.232220219 |
| No  | 80 | Female | Yes | Yes | No  | <=7days | Early | 0.202143002 |
| No  | 80 | Female | Yes | Yes | No  | <=7days | Late  | 0.202143002 |
| Yes | 80 | Male   | Yes | Yes | Yes | <=7days | Early | 0.198100364 |
| Yes | 80 | Male   | Yes | Yes | Yes | <=7days | Late  | 0.198100364 |
| No  | 80 | Male   | Yes | No  | Yes | >7days  | Early | 0.195831134 |
| No  | 80 | Male   | Yes | No  | Yes | >7days  | Late  | 0.195831134 |
| No  | 60 | Male   | Yes | Yes | Yes | >7days  | Early | 0.192839948 |
| No  | 60 | Male   | Yes | Yes | Yes | >7days  | Late  | 0.192839948 |
| No  | 60 | Male   | Yes | No  | No  | <=7days | Early | 0.183209756 |
| No  | 60 | Male   | Yes | No  | No  | <=7days | Late  | 0.183209756 |
| No  | 80 | Male   | No  | No  | No  | <=7days | Early | 0.146940755 |
| No  | 80 | Male   | No  | No  | No  | <=7days | Late  | 0.146940755 |
| No  | 60 | Male   | No  | Yes | No  | <=7days | Early | 0.144304534 |
| No  | 60 | Male   | No  | Yes | No  | <=7days | Late  | 0.144304534 |
| Yes | 80 | Male   | No  | No  | Yes | <=7days | Early | 0.122189859 |
| Yes | 80 | Male   | No  | No  | Yes | <=7days | Late  | 0.122189859 |
| Yes | 60 | Male   | No  | Yes | Yes | <=7days | Early | 0.119788921 |
| Yes | 60 | Male   | No  | Yes | Yes | <=7days | Late  | 0.119788921 |
| No  | 60 | Male   | No  | No  | Yes | >7days  | Early | 0.117993597 |
| No  | 60 | Male   | No  | No  | Yes | >7days  | Late  | 0.117993597 |
| No  | 80 | Male   | Yes | No  | Yes | <=7days | Early | 0.115117935 |
| No  | 80 | Male   | Yes | No  | Yes | <=7days | Late  | 0.115117935 |

|     |    |        |     |     |     |         |       |             |
|-----|----|--------|-----|-----|-----|---------|-------|-------------|
| No  | 60 | Male   | Yes | Yes | Yes | <=7days | Early | 0.112792455 |
| No  | 60 | Male   | Yes | Yes | Yes | <=7days | Late  | 0.112792455 |
| Yes | 60 | Male   | Yes | No  | No  | >7days  | Early | 0.110071787 |
| Yes | 60 | Male   | Yes | No  | No  | >7days  | Late  | 0.110071787 |
| Yes | 80 | Female | No  | Yes | Yes | >7days  | Early | 0.107347851 |
| Yes | 80 | Female | No  | Yes | Yes | >7days  | Late  | 0.107347851 |
| Yes | 80 | Male   | Yes | Yes | No  | <=7days | Early | 0.085025151 |
| Yes | 80 | Male   | Yes | Yes | No  | <=7days | Late  | 0.085025151 |
| No  | 80 | Male   | Yes | No  | No  | >7days  | Early | 0.083546798 |
| No  | 80 | Male   | Yes | No  | No  | >7days  | Late  | 0.083546798 |
| Yes | 80 | Male   | No  | No  | No  | >7days  | Early | 0.082624218 |
| Yes | 80 | Male   | No  | No  | No  | >7days  | Late  | 0.082624218 |
| No  | 60 | Male   | Yes | Yes | No  | >7days  | Early | 0.081611748 |
| No  | 60 | Male   | Yes | Yes | No  | >7days  | Late  | 0.081611748 |
| Yes | 60 | Male   | No  | Yes | No  | >7days  | Early | 0.080702076 |
| Yes | 60 | Male   | No  | Yes | No  | >7days  | Late  | 0.080702076 |
| No  | 80 | Female | No  | Yes | Yes | <=7days | Early | 0.069300125 |
| No  | 80 | Female | No  | Yes | Yes | <=7days | Late  | 0.069300125 |
| Yes | 80 | Male   | Yes | No  | Yes | >7days  | Early | 0.060156935 |
| Yes | 80 | Male   | Yes | No  | Yes | >7days  | Late  | 0.060156935 |
| No  | 80 | Male   | No  | Yes | No  | >7days  | Early | 0.058924488 |
| No  | 80 | Male   | No  | Yes | No  | >7days  | Late  | 0.058924488 |
| No  | 60 | Male   | No  | No  | Yes | <=7days | Early | 0.058806535 |
| No  | 60 | Male   | No  | No  | Yes | <=7days | Late  | 0.058806535 |
| Yes | 60 | Male   | Yes | Yes | Yes | >7days  | Early | 0.058581703 |
| Yes | 60 | Male   | Yes | Yes | Yes | >7days  | Late  | 0.058581703 |
| No  | 80 | Male   | Yes | Yes | Yes | >7days  | Early | 0.04109502  |
| No  | 80 | Male   | Yes | Yes | Yes | >7days  | Late  | 0.04109502  |
| No  | 80 | Male   | Yes | No  | No  | <=7days | Early | 0.037208577 |
| No  | 80 | Male   | Yes | No  | No  | <=7days | Late  | 0.037208577 |
| No  | 60 | Male   | Yes | Yes | No  | <=7days | Early | 0.036070298 |
| No  | 60 | Male   | Yes | Yes | No  | <=7days | Late  | 0.036070298 |
| Yes | 60 | Male   | No  | No  | Yes | >7days  | Early | 0.025118337 |
| Yes | 60 | Male   | No  | No  | Yes | >7days  | Late  | 0.025118337 |
| No  | 80 | Male   | No  | Yes | No  | <=7days | Early | 0.023420678 |
| No  | 80 | Male   | No  | Yes | No  | <=7days | Late  | 0.023420678 |
| Yes | 80 | Male   | No  | Yes | Yes | <=7days | Early | 0.016322323 |
| Yes | 80 | Male   | No  | Yes | Yes | <=7days | Late  | 0.016322323 |
| No  | 80 | Male   | No  | No  | Yes | >7days  | Early | 0.015851257 |
| No  | 80 | Male   | No  | No  | Yes | >7days  | Late  | 0.015851257 |
| No  | 60 | Male   | No  | Yes | Yes | >7days  | Early | 0.015243056 |
| No  | 60 | Male   | No  | Yes | Yes | >7days  | Late  | 0.015243056 |
| No  | 80 | Male   | Yes | Yes | Yes | <=7days | Early | 0.01452431  |
| No  | 80 | Male   | Yes | Yes | Yes | <=7days | Late  | 0.01452431  |
| Yes | 80 | Male   | Yes | No  | No  | >7days  | Early | 0.013852597 |
| Yes | 80 | Male   | Yes | No  | No  | >7days  | Late  | 0.013852597 |
| Yes | 60 | Male   | Yes | Yes | No  | >7days  | Early | 0.013304146 |

|     |    |      |     |     |     |         |       |             |
|-----|----|------|-----|-----|-----|---------|-------|-------------|
| Yes | 60 | Male | Yes | Yes | No  | >7days  | Late  | 0.013304146 |
| No  | 80 | Male | Yes | Yes | No  | >7days  | Early | 0.007754826 |
| No  | 80 | Male | Yes | Yes | No  | >7days  | Late  | 0.007754826 |
| Yes | 80 | Male | No  | Yes | No  | >7days  | Early | 0.007588076 |
| Yes | 80 | Male | No  | Yes | No  | >7days  | Late  | 0.007588076 |
| No  | 80 | Male | No  | No  | Yes | <=7days | Early | 0.004107319 |
| No  | 80 | Male | No  | No  | Yes | <=7days | Late  | 0.004107319 |
| Yes | 80 | Male | Yes | Yes | Yes | >7days  | Early | 0.004076921 |
| Yes | 80 | Male | Yes | Yes | Yes | >7days  | Late  | 0.004076921 |
| No  | 60 | Male | No  | Yes | Yes | <=7days | Early | 0.003899691 |
| No  | 60 | Male | No  | Yes | Yes | <=7days | Late  | 0.003899691 |
| No  | 80 | Male | Yes | Yes | No  | <=7days | Early | 0.00159182  |
| No  | 80 | Male | Yes | Yes | No  | <=7days | Late  | 0.00159182  |
| Yes | 80 | Male | No  | No  | Yes | >7days  | Early | 0.000789073 |
| Yes | 80 | Male | No  | No  | Yes | >7days  | Late  | 0.000789073 |
| Yes | 60 | Male | No  | Yes | Yes | >7days  | Early | 0.000737608 |
| Yes | 60 | Male | No  | Yes | Yes | >7days  | Late  | 0.000737608 |
| No  | 80 | Male | No  | Yes | Yes | >7days  | Early | 0.000299536 |
| No  | 80 | Male | No  | Yes | Yes | >7days  | Late  | 0.000299536 |
| Yes | 80 | Male | Yes | Yes | No  | >7days  | Early | 0.000230073 |
| Yes | 80 | Male | Yes | Yes | No  | >7days  | Late  | 0.000230073 |
| No  | 80 | Male | No  | Yes | Yes | <=7days | Early | 2.13E-05    |
| No  | 80 | Male | No  | Yes | Yes | <=7days | Late  | 2.13E-05    |
| Yes | 80 | Male | No  | Yes | Yes | >7days  | Early | 8.43E-07    |
| Yes | 80 | Male | No  | Yes | Yes | >7days  | Late  | 8.43E-07    |
